# Supplementary material for: SIRT1, miR-132 and miR-212 link human longevity to Alzheimer’s Disease
Source: Springer Nature journal article supplement (doi:10.1038/s41598-018-26547-6), 2018-05-25
Supplement: MOESM1 [file 41598_2018_26547_MOESM1_ESM.pdf]

# *SIRT1*, miR-132 and miR-212 link human longevity to Alzheimer's Disease

A Hadar, E Milanesi, M Walczak, M Puzianowska-Kuźnicka, J Kuźnicki, A Squassina, P Niola, C Chillotti, J Attems, I Gozes and D Gurwitz

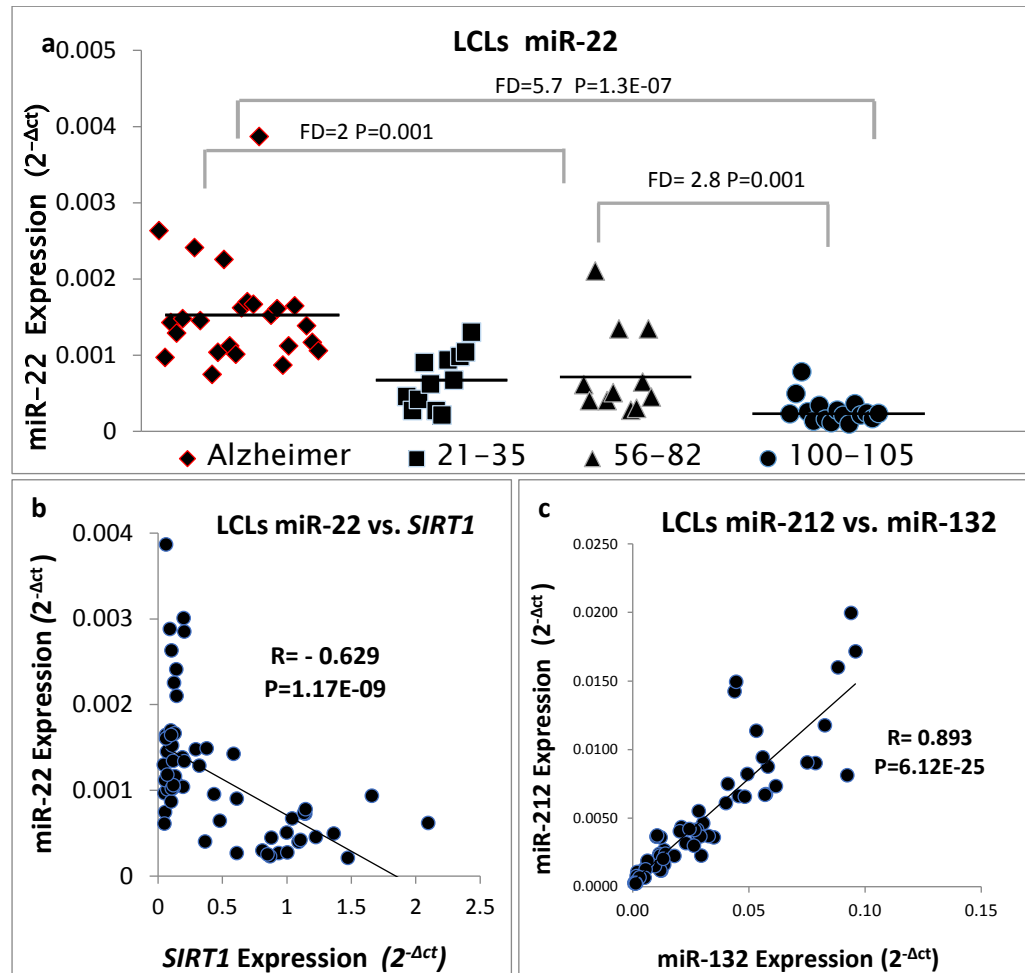

**Supplementary Figure 1. miR-22 expression levels in human LCLs differ across age groups and show negative correlations with *SIRT1*.** Expression levels ( $2^{-\Delta ct}$ ) for miR-22, miR-212, miR-132, and *SIRT1* were measured in female LCLs from Alzheimer's disease patients (N=24), healthy controls aged 21-35 years (N=12), healthy controls aged 56-82 years (N=11), and centenarians (N=16): (a) miR-22 (b) Negative Pearson correlation between the expression levels of *SIRT1* and the expression levels of miR-22 in the combined LCL cohorts combined (N=69). (c) Pearson correlation between expression levels of miR-212 and miR-132 (N=69).

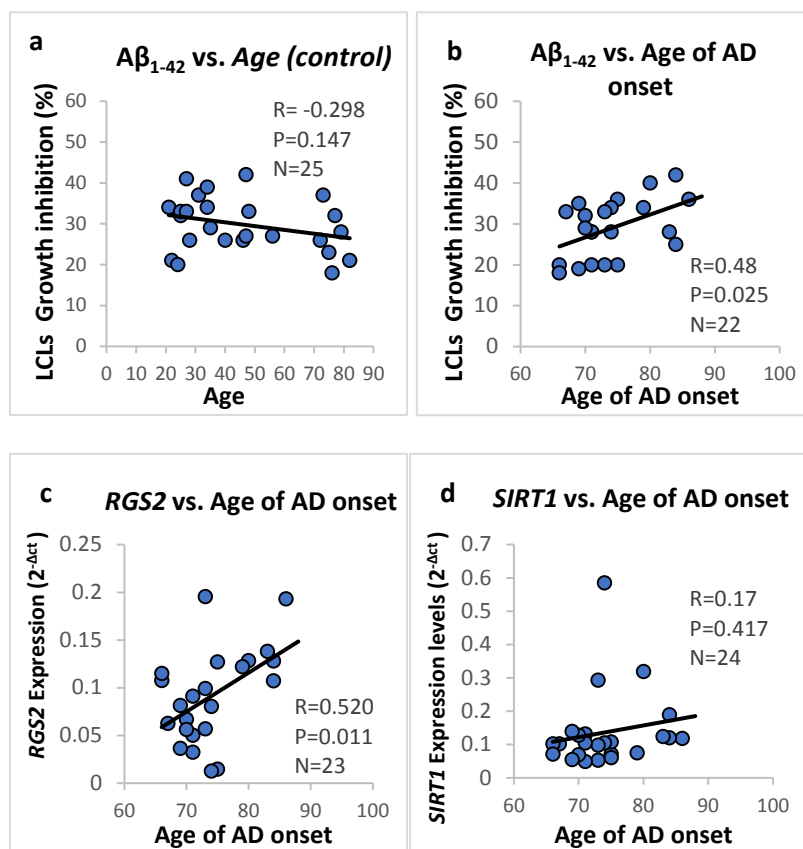

**Supplementary Figure 2. Age of Alzheimer's disease (AD) onset and in vitro growth inhibition of LCLs by  $A\beta_{1-42}$ .** (a) Lack of correlation between female control donors age and in vitro growth inhibition in their LCLs by 8  $\mu M$   $A\beta_{1-42}$  (N=25). (b-d) Pearson correlations between age of disease onset in female AD patients and: (b) growth inhibition by 8  $\mu M$   $A\beta_{1-42}$  in their LCLs (N=22). (c) *RGS2* expression levels in their LCLs (N=23). (d) *SIRT1* expression levels in their LCLs (N=24). Gene expression levels were determined by real-time PCR (see Methods); growth inhibition by  $A\beta_{1-42}$  was determined by the XTT cell proliferation kit (see Supplementary Methods).

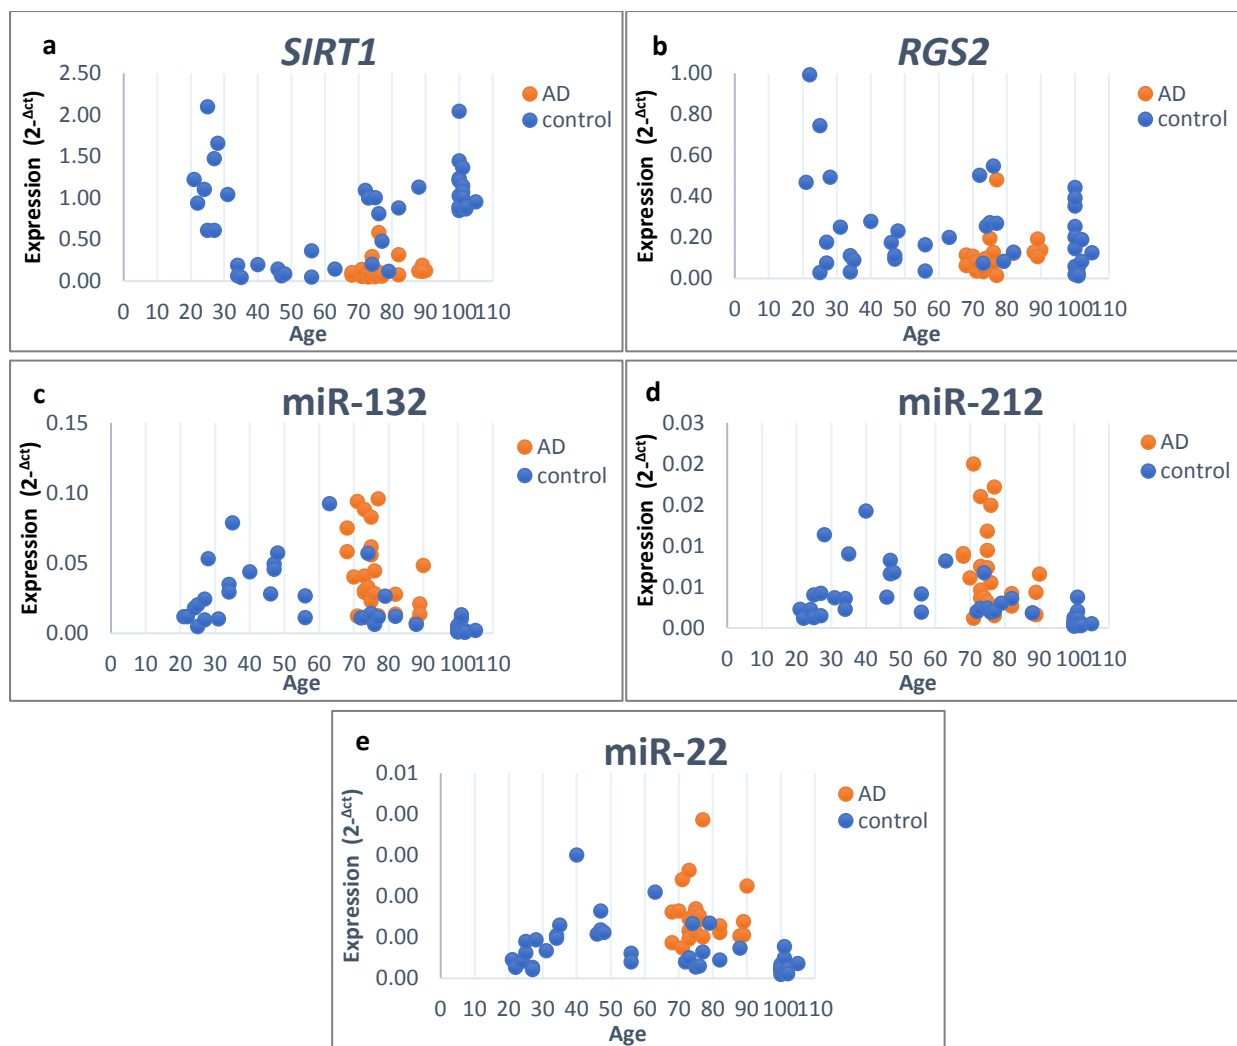

**Supplementary Figure 3.** Scatter plots of *SIRT1*, *RGS2*, miR-132, miR-212 and miR-22 expression levels in female LCLs across their age. Gene expression levels were determined by real-time PCR (N=69; see Methods).

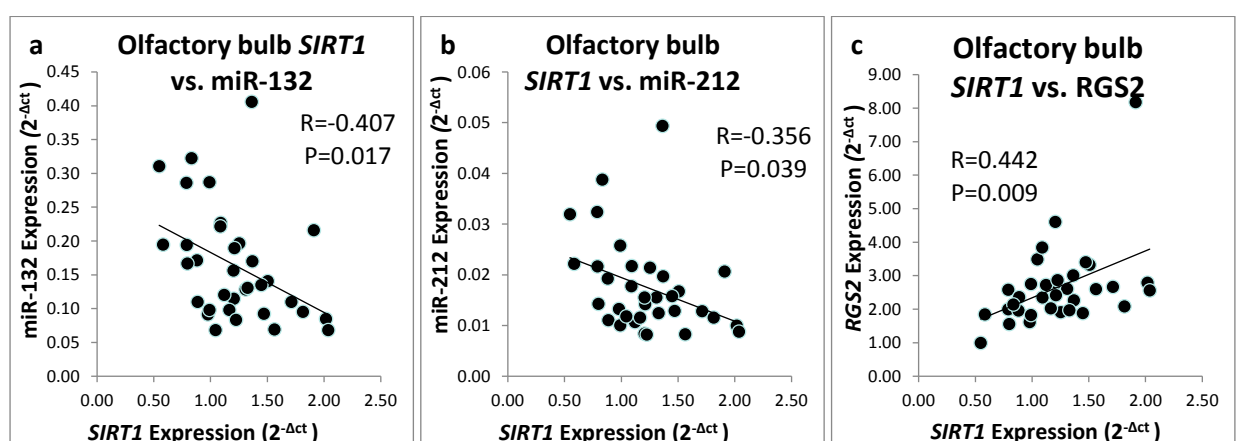

**Supplementary Figure 4.** Pearson correlations between the expression levels of studied genes and miRNAs in human olfactory bulb postmortem tissues. Data are from real-time PCR experiments in the combined olfactory bulb postmortem tissues from AD patients and age-matched non-demented controls (N=34; see Methods).

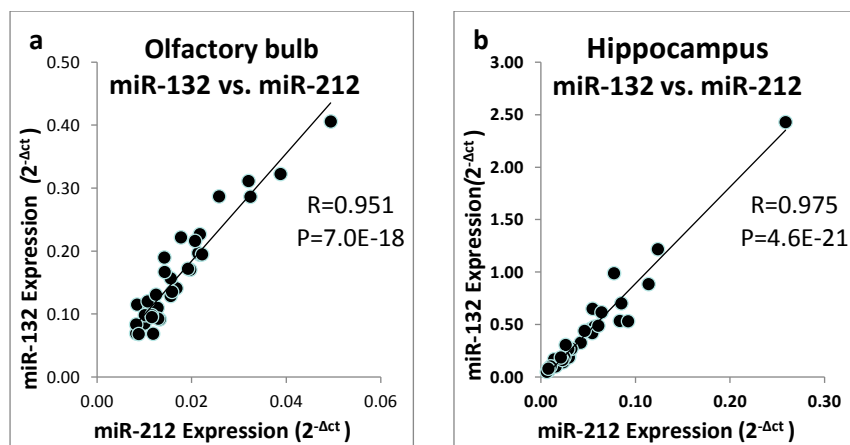

**Supplementary Figure 5. Pearson correlations between the expression levels of miR-212 and miR-132.** (a) olfactory bulb (N=34). (b) Hippocampus (N=32). Data are from real-time PCR experiments in the combined cohorts of olfactory bulb and hippocampus postmortem tissues from AD patients and age-matched non-demented controls (see Methods).

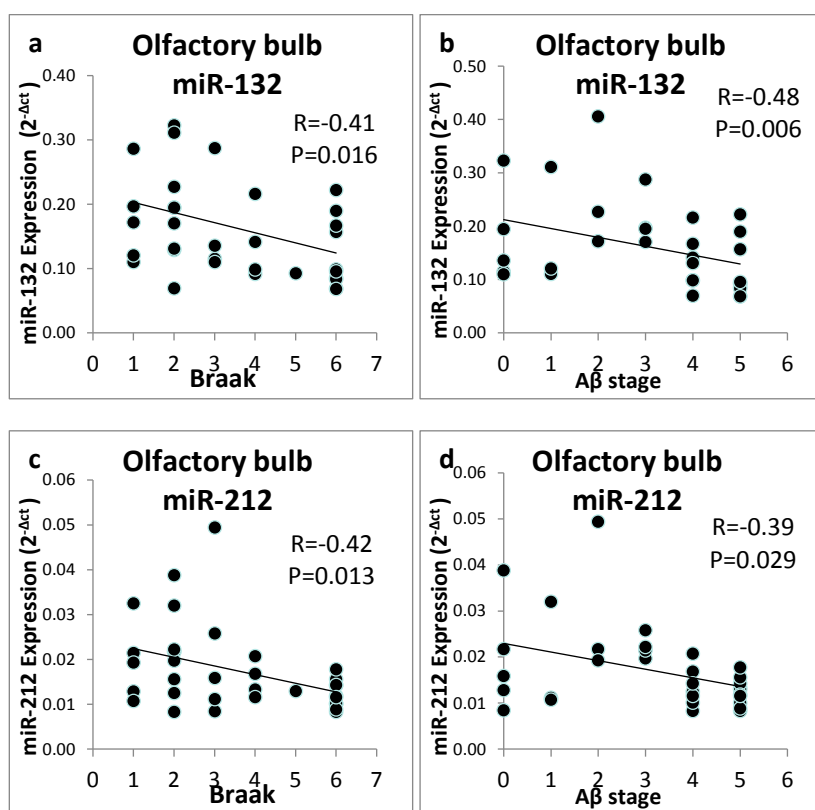

**Supplementary Figure 6. Spearman correlations between the expression levels of miR-132 or miR-212 and the postmortem olfactory bulb Braak and Aβ stages of the combined AD patients and age-matched controls.** (a,c) Correlations with Braak stages (N=34). (b,d) Correlations with Aβ stages (N=32).

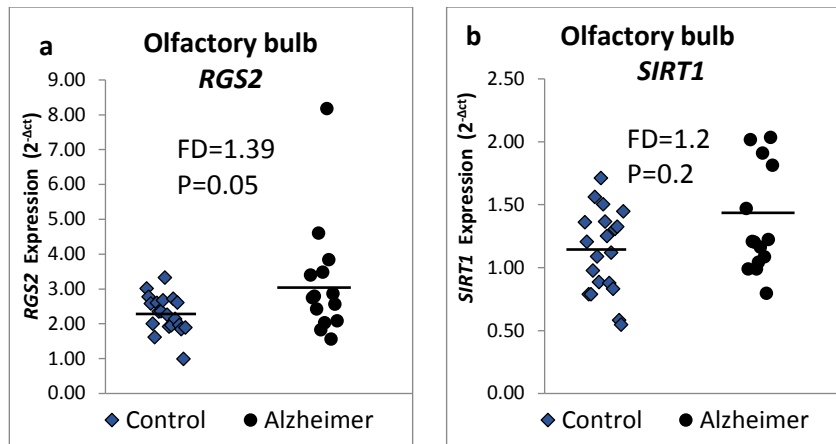

**Supplementary Figure 7. Postmortem olfactory bulb expression levels.** Expression levels ( $2^{-\Delta ct}$ ) are compared for (a) *RGS2* and (b) *SIRT1* in AD patients (N=14) and age-matched non-demented controls (N=20).

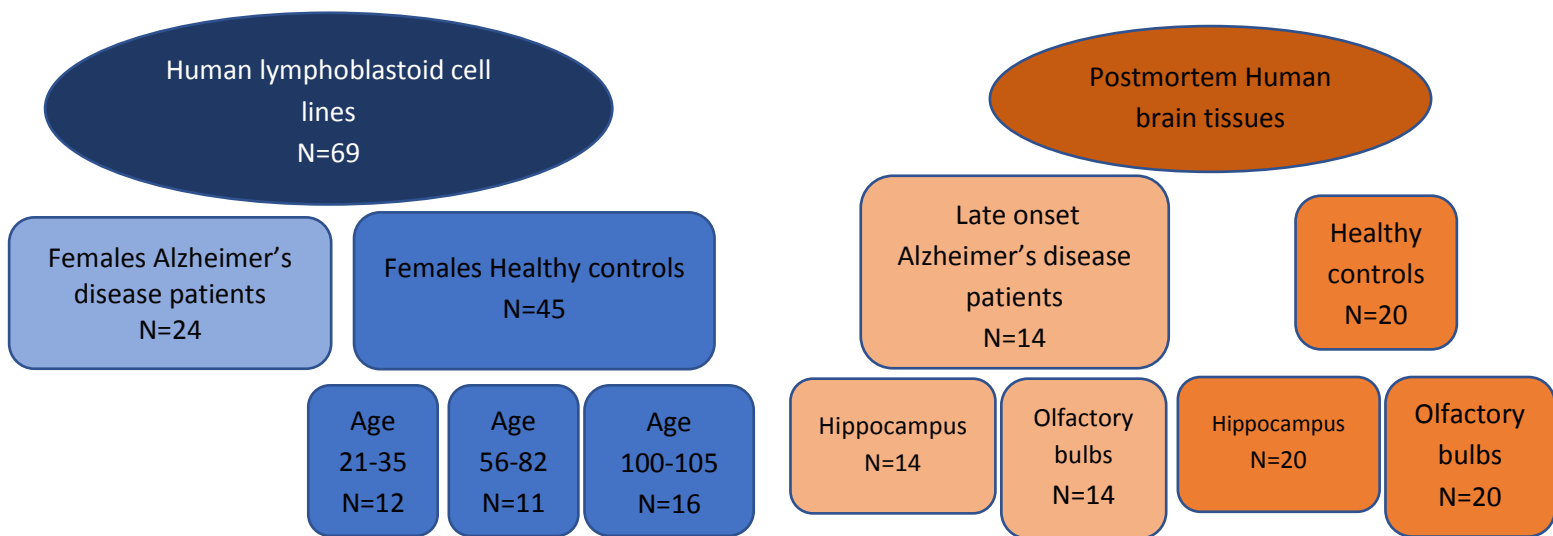

**Supplementary Figure 8. A flowchart presenting the study design.**

**Supplementary Table 1: (a) Demographic data for Alzheimer’s disease patients (LCLs cohort).** Sex, age, age at first AD diagnosis, MMSE and ADAS scores (at time of blood collection for LCL generation) are shown for 24 female AD patients.

| <i>ID sample</i> | <i>Sex</i> | <i>Age at sampling (years)</i> | <i>Age at onset (years)</i> | <i>MMSE</i> | <i>ADAS</i> |
|------------------|------------|--------------------------------|-----------------------------|-------------|-------------|
| <b>1162</b>      | F          | 90                             | 83                          | 14.4        | 16.3        |
| <b>1088</b>      | F          | 89                             | 86                          | 15.4        | 25.9        |
| <b>1092</b>      | F          | 89                             | 84                          | 14.8        | 15.6        |
| <b>1170</b>      | F          | 88                             | 84                          | NA          | NA          |
| <b>1150</b>      | F          | 82                             | 79                          | 20.5        | 17.6        |
| <b>1215</b>      | F          | 82                             | 80                          | 14.5        | 27          |
| <b>1132</b>      | F          | 77                             | 75                          | 15          | 29.6        |
| <b>1149</b>      | F          | 77                             | 75                          | 20.7        | 6.6         |
| <b>1130</b>      | F          | 76                             | 75                          | 20.7        | 10.6        |
| <b>1219</b>      | F          | 76                             | 74                          | 22          | 13.6        |
| <b>1110</b>      | F          | 75                             | 73                          | 24          | 11.9        |
| <b>1121</b>      | F          | 75                             | 74                          | 19.7        | 15.6        |
| <b>1135</b>      | F          | 75                             | 70                          | 22.3        | 17.2        |
| <b>1214</b>      | F          | 74                             | 73                          | 16.3        | 14.9        |
| <b>1090</b>      | F          | 73                             | 71                          | 21.4        | 14.9        |
| <b>1187</b>      | F          | 73                             | 70                          | 18.7        | 20          |
| <b>1229</b>      | F          | 73                             | 71                          | 20.4        | 20.3        |
| <b>1235</b>      | F          | 73                             | 71                          | 21.3        | 17          |
| <b>1173</b>      | F          | 71                             | 69                          | 19.3        | 23.3        |
| <b>1197</b>      | F          | 71                             | 69                          | 19.7        | 10.6        |
| <b>1100</b>      | F          | 70                             | 66                          | 14.3        | 23.2        |
| <b>1118</b>      | F          | 68                             | 67                          | 21.4        | 19.7        |
| <b>1141</b>      | F          | 75                             | 73                          | 22          | 23          |
| <b>1145</b>      | F          | 68                             | 66                          | NA          | NA          |

**(b) Demographic data for healthy adult controls (LCLs cohort).**

| <i>ID<br/>sample</i> | <i>Sex</i> | <i>Age<br/>(years)</i> |
|----------------------|------------|------------------------|
| 1012                 | F          | 56                     |
| 1016                 | F          | 47                     |
| 1060                 | F          | 79                     |
| 1376                 | F          | 56                     |
| 1379                 | F          | 74                     |
| 1446                 | F          | 63                     |
| 1466                 | F          | 34                     |
| 1706                 | F          | 35                     |
| 1728                 | F          | 48                     |
| 1744                 | F          | 46                     |
| 1791                 | F          | 47                     |
| 1793                 | F          | 40                     |
| 1799                 | F          | 34                     |
| 1728                 | F          | 22                     |
| 1516                 | F          | 75                     |
| 1370                 | F          | 24                     |
| 1515                 | F          | 88                     |
| 1389                 | F          | 28                     |
| 1978                 | F          | 76                     |
| 1518                 | F          | 82                     |

| <i>ID<br/>sample</i> | <i>Sex</i> | <i>Age<br/>(years)</i> |
|----------------------|------------|------------------------|
| 1130                 | F          | 72                     |
| 1146                 | F          | 21                     |
| 6037                 | F          | 77                     |
| 1826                 | F          | 27                     |
| 1823                 | F          | 25                     |
| 1549                 | F          | 73                     |
| 1754                 | F          | 25                     |
| 1801                 | F          | 27                     |
| 1128                 | F          | 31                     |
| 216                  | F          | 100                    |
| 301                  | F          | 100                    |
| 343                  | F          | 100                    |
| 349                  | F          | 100                    |
| 352                  | F          | 100                    |
| 353                  | F          | 100                    |
| 446                  | F          | 100                    |
| 450                  | F          | 100                    |
| 176                  | F          | 102                    |
| 346                  | F          | 102                    |
| 361                  | F          | 105                    |

| <i>ID<br/>sample</i> | <i>Sex</i> | <i>Age<br/>(years)</i> |
|----------------------|------------|------------------------|
| 574                  | F          | 100                    |
| 180                  | F          | 101                    |
| 197                  | F          | 101                    |
| 298                  | F          | 101                    |
| 516                  | F          | 101                    |

**Supplementary Table 2: Demographic data for Alzheimer's disease patients and healthy controls (cohort of postmortem brain tissues).** Sex, average ages and last MMSE scores are shown.

| Group               | N  | Male | Female | Age       | MMSE     |
|---------------------|----|------|--------|-----------|----------|
| Alzheimer's disease | 14 | 10   | 4      | 88.2±6.2  | 9.2±7.5  |
| Control             | 20 | 11   | 9      | 86.5±10.5 | 28.5±1.1 |

**Supplementary Table 3: Benjamini-Hochberg adjusted P-values for multiple testing.**

Adjusted p-values with FDR< 0.05 (in bold fonts) were considered significant. Statistical analyses are described under Methods. Two-tailed non-parametric Mann-Whitney U test was applied for all genes and miRNAs tested; while one-tailed Mann-Whitney U test was applied for miR-132 and miR-212 in postmortem brain tissues (as previous findings indicated that these two miRNAs were downregulated in postmortem hippocampus brain tissues from AD patients<sup>48</sup>).

| LCLs<br>Alzheimer vs<br>100-105 group | P-value<br>(two-tailed<br>Mann-Whitney U<br>test) | Benjamini-Hochberg<br>adjusted P-value |
|---------------------------------------|---------------------------------------------------|----------------------------------------|
| <i>SIRT1</i>                          | .00000012                                         | .00000034                              |
| <i>miR-22</i>                         | .00000013                                         | .00000034                              |
| <i>miR-132</i>                        | .00000021                                         | .00000035                              |
| <i>miR-212</i>                        | .00000077                                         | .00000097                              |
| <i>RGS2</i>                           | .3203                                             | .3203                                  |
| Alzheimer vs<br>56-82 group           | P-value<br>(two-tailed<br>Mann-Whitney U<br>test) | Benjamini-Hochberg<br>adjusted P-value |
| <i>miR-22</i>                         | .00108                                            | .00391                                 |
| <i>SIRT1</i>                          | .00156                                            | .00391                                 |
| <i>miR-132</i>                        | .01421                                            | .01960                                 |
| <i>RGS2</i>                           | .01568                                            | .01960                                 |
| <i>miR-212</i>                        | .03604                                            | .03604                                 |
| 56-82 group vs<br>100-105 group       | P-value<br>(two-tailed<br>Mann-Whitney U<br>test) | Benjamini-Hochberg<br>adjusted P-value |
| <i>miR-132</i>                        | .000064                                           | .000321                                |
| <i>miR-212</i>                        | .000145                                           | .000362                                |
| <i>miR-22</i>                         | .000552                                           | .000920                                |
| <i>SIRT1</i>                          | .001339                                           | .001674                                |
| <i>RGS2</i>                           | .300                                              | .300                                   |



| Hippocampus<br>Alzheimer vs<br>control    | P-value<br>(one-tailed Mann-<br>Whitney U test | Benjamini-<br>Hochberg<br>adjusted P-value |
|-------------------------------------------|------------------------------------------------|--------------------------------------------|
| miR-212                                   | .0040                                          | .0080                                      |
| miR-132                                   | .0290                                          | .0290                                      |
| Olfactory bulb<br>Alzheimer vs<br>control | P-value<br>(one-tailed Mann-<br>Whitney U test | Benjamini-<br>Hochberg<br>adjusted P-value |
| miR-212                                   | .0250                                          | .0370                                      |
| miR-132                                   | .0370                                          | .0370                                      |

| Hippocampus<br>Alzheimer vs<br>control    | P-value<br>(two-tailed Mann-<br>Whitney U test | Benjamini-<br>Hochberg<br>adjusted P-value |
|-------------------------------------------|------------------------------------------------|--------------------------------------------|
| <i>SIRT1</i>                              | .402                                           | .849                                       |
| <i>RGS2</i>                               | .827                                           | .849                                       |
| miR-22                                    | .849                                           | .849                                       |
| Olfactory bulb<br>Alzheimer vs<br>control | P-value<br>(two-tailed Mann-<br>Whitney U test | Benjamini-<br>Hochberg<br>adjusted P-value |
| <i>RGS2</i>                               | .0500                                          | .1501                                      |
| <i>SIRT1</i>                              | .2207                                          | .3310                                      |
| miR-22                                    | .4624                                          | .4624                                      |

## Supplementary Methods

### Cell proliferation assay

Cell growth inhibition was examined in vitro in LCLs by exposure to 8  $\mu$ M pre-aggregated A $\beta$ <sub>1-42</sub> fibrils for 3 days, as described<sup>18</sup>. LCLs were first washed in PBS and suspended with serum-free RPMI medium containing 4% BIOGRO-2 (Biological Industries, Beit-Haemek, Israel). This BIOGRO-2 concentration was optimal for long-term serum-free growth of LCLs<sup>1</sup>. The serum-free conditions are essential for observing A $\beta$ <sub>1-42</sub> mediated growth inhibition. Cells were counted and diluted in the same media to a concentration of 250,000 cells/ml, followed by plating 100  $\mu$ l per well in 96-well plates (Corning Incorporated, NY, USA). Amyloid- $\beta$ <sub>1-42</sub> (A $\beta$ <sub>1-42</sub>) peptide was purchased from Genemed Synthesis Inc. (San Antonio, TX, USA). A $\beta$ <sub>1-42</sub> peptide was dissolved in sterile tissue-culture grade water (1 mg/ml) and stored (as 100  $\mu$ l aliquots) at -20°C. Prior to experiments, an aliquot of A $\beta$ <sub>1-42</sub> in water was pre-incubated at 37 °C for 3 days<sup>2,3</sup> for assuring the generation of A $\beta$  fibrils<sup>4,5</sup>. Following A $\beta$ <sub>1-42</sub> treatment, LCL proliferation was assayed by the XTT cell proliferation kit (Biological Industries, Israel) as described<sup>6</sup>. Each cell line was tested for its sensitivity to A $\beta$ <sub>1-42</sub> (in triplicate) in three independent experiments.

## References for Supplementary Methods\*

1. Milanesi E, Hadar A, Maffioletti E, et al. Insulin-like Growth Factor 1 Differentially Affects Lithium Sensitivity of Lymphoblastoid Cell Lines from Lithium Responder and Non-responder Bipolar Disorder Patients. *Journal of molecular neuroscience : MN*. 2015;56(3):681-687.
2. Morishima Y, Gotoh Y, Zieg J, et al. Beta-amyloid induces neuronal apoptosis via a mechanism that involves the c-Jun N-terminal kinase pathway and the induction of Fas ligand. *The Journal of neuroscience : the official journal of the Society for Neuroscience*. 2001;21(19):7551-7560.
3. Elkind E, Vaisid T, Kornspan JD, Barnoy S, Rottem S, Kosower NS. Neuroprotective effects of Mycoplasma hyorhinis against amyloid-beta-peptide toxicity in SH-SY5Y human neuroblastoma cells are mediated by calpastatin upregulation in the mycoplasma-infected cells. *Neurochemistry international*. 2011;58(4):497-503.
4. Soreghan B, Kosmoski J, Glabe C. Surfactant properties of Alzheimer's A beta peptides and the mechanism of amyloid aggregation. *The Journal of biological chemistry*. 1994;269(46):28551-28554.
5. Bernstein SL, Wytttenbach T, Baumketner A, et al. Amyloid beta-protein: monomer structure and early aggregation states of Abeta42 and its Pro19 alloform. *Journal of the American Chemical Society*. 2005;127(7):2075-2084.
6. Morag A, Pasmanik-Chor M, Oron-Karni V, Rehavi M, Stingl JC, Gurwitz D. Genome-wide expression profiling of human lymphoblastoid cell lines identifies CHL1 as a putative SSRI antidepressant response biomarker. *Pharmacogenomics*. 2011;12(2):171-184.

\*This file also cites articles listed in the main article file.
